# Supplementary material
Source: publisher figshare collection journal article supplement (https://acs.figshare.com/ndownloader/files/15284297)
Supplement: Supplementary file 1 [file 15284297]

ID	Smiles	XIAP-BIR3 IC50 @ 8h incubation (nM)
Compound 9	CN[C@H](C(N[C@@H](CC1=CC=C(OS(=O)(F)=O)C=C1)C(N2CCC[C@H]2C(NC3CC4=C(C=CC=C4)C3)=O)=O)=O)C	65
Compound 10	CN[C@H](C(N[C@@H](CC1=CC=C(OS(=O)(F)=O)C=C1)C(N2CCC[C@H]2C(N[C@@H]3CCC4=C3C=CC=C4F)=O)=O)=O)C	28
Compound 11	CN[C@H](C(N[C@@H](CNC(C1=CC=C(S(=O)(F)=O)C=C1)=O)C(N2CCC[C@H]2C(N[C@@H]3CCC4=C3C=CC=C4F)=O)=O)=O)C	3.5
